# Supplementary material
Source: Springer Nature journal article supplement (https://www.springermedizin.de/resource/supplementary/13018_2010_269_MOESM3_ESM.pdf/9636674)

**Serum Osteocalcin (ng/ml)**

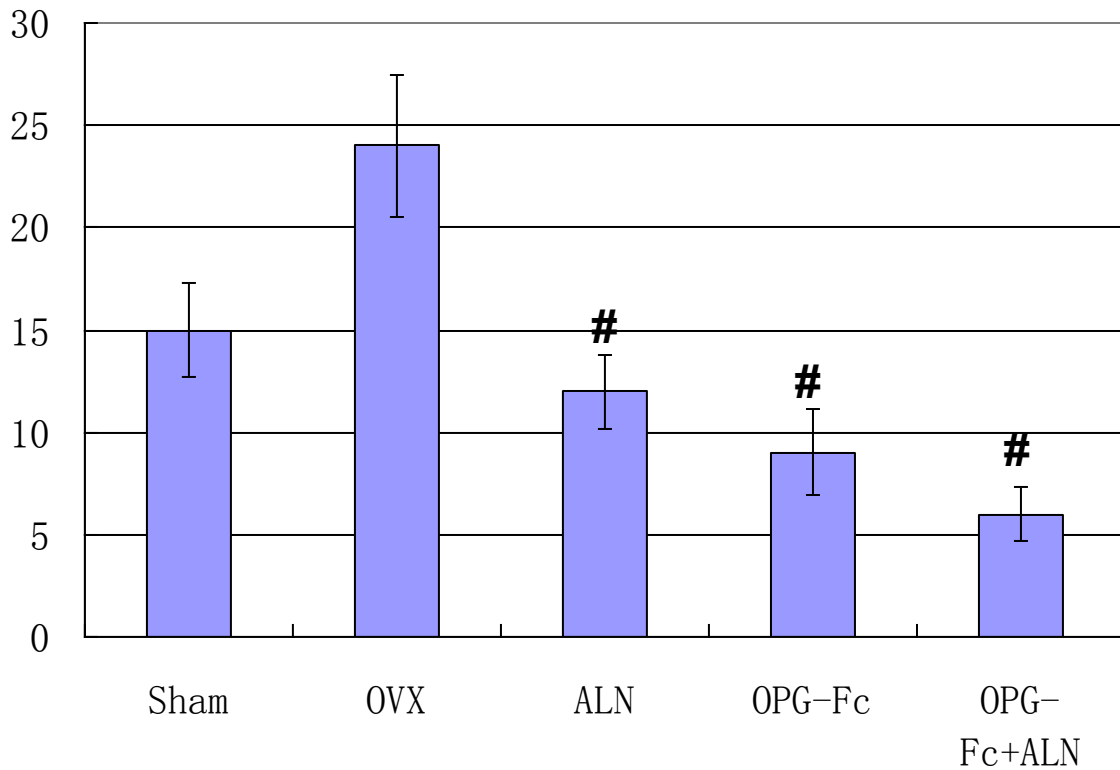

**Treatment Groups**

Supplement: MOESM3 [file 9636674]
